# Supplementary material for: Never, Ever Make an Enemy… Out of an Anemone: Transcriptomic Comparison of Clownfish Hosting Sea Anemone Venoms
Source: MDPI journal article supplement (doi:10.3390/md20120730), 2022-11-23
Supplement: s1 [file s1]

|                                |                                                                                                                                                                                                                                                                                                    |
|--------------------------------|----------------------------------------------------------------------------------------------------------------------------------------------------------------------------------------------------------------------------------------------------------------------------------------------------|
| Transcriptome assembly         | -Download sampling using SRA<br>-FASTQC<br>-De novo assembly, Trinityv2.2<br>-Trimmomatic<br>-BUSCO v5.3.1<br>-Metazoa_odb10 lineage dataset<br>-TransDecoder v5.5.0<br>Minimum seq length of 50 amino acids                                                                                       |
| Candidate toxin identification | -Blast+2.8.1 (e-value 0.001)<br>-Tox:prot animal venom database, keywords ("Cnidaria"), downloaded 2021<br>-NCBI Protein database, keywords "(Cnidaria AND ((Toxin) OR (Venom)))"<br>-HMMER 3.1b2<br>-Using all Cnidarian venom protein classes from VenomZone.                                    |
| Filtering data                 | -Signal P V5.0 (70%>)<br>-https://services.healthtech.dtu.dk/service.php?SignalP-5.0<br>-CD-HIT v4.6.8 (cutoff 0.95)<br>-https://sites.google.com/view/cd-hit<br>-Reciprocal blastsearch against a concatenated transcriptome                                                                      |
| Annotation & Confirmation      | -Blastp<br>-Tox-Prot Animal venom database (e-value 1e-5)<br>-NCBI non-redundant protein database (NR DB)<br>-Hmmssearch PFAM (e-value 1e-5)<br>-Manual curation to ensure all results matched<br>-Assigned venom categories based on uniprot/prior research<br>-Create alignment of select toxins |

Supplementary figure s1. Annotation pipeline for project.

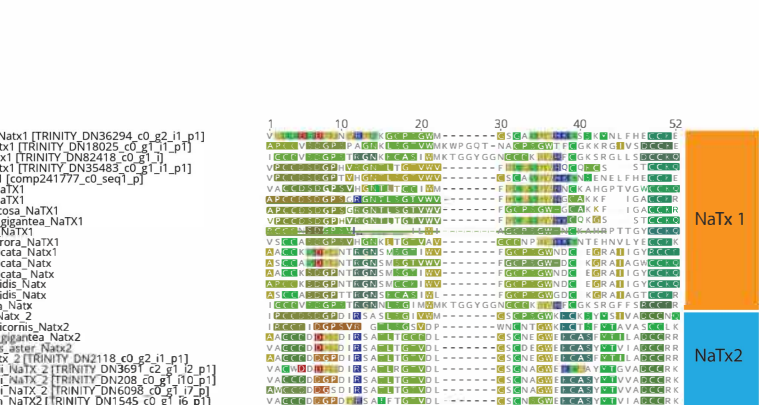

Supplementary figure s2. Alignment shows both NaTx1 (aqua) and NaTx2 (orange) across sea anemone species. All species show a conserved cysteine pattern across both NaTx types. NaTx2 shows distinction with having a conserved region across amino acids 39-44.

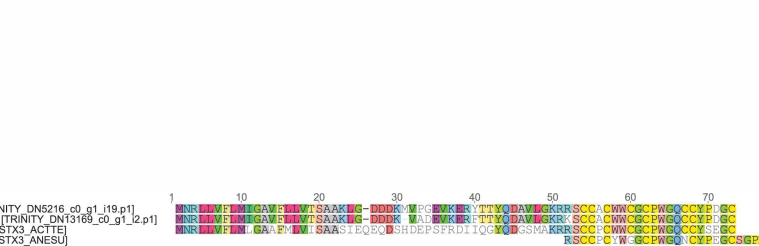

Supplementary figure s3. Alignment showing Sea anemone short type 3 toxins. Mature region shows a rich cysteine composition (CC-C-C-CC-C).

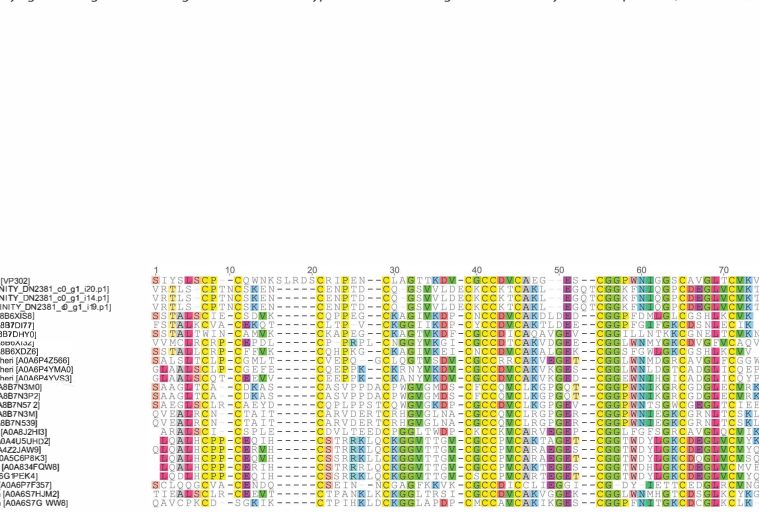

Supplementary figure s4. Alignment showing the insulin like toxin Venom protein 302 across all known species. Alignment shows conserved and rich cysteine region (CX5-CC CX4).

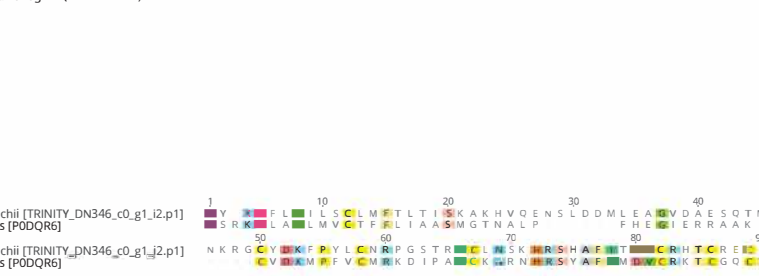

Supplementary figure s5. Alignment showing Shk-like-1 mature toxin. Alignment shows 7 conserved cysteines across both samples.
