# Supplementary material for: Never, Ever Make an Enemy… Out of an Anemone: Transcriptomic Comparison of Clownfish Hosting Sea Anemone Venoms
Source: MDPI journal article supplement (doi:10.3390/md20120730), 2022-11-23
Supplement: s1 [file s1]

| Clade           | Taxon                            | Transcripts | genes  | N50  | Average<br>contig<br>length | Median<br>contig<br>length | percent G/C | BUSCO %<br>(protein) | BUSCO % |
|-----------------|----------------------------------|-------------|--------|------|-----------------------------|----------------------------|-------------|----------------------|---------|
| Stichodactylina | <i>C.adhaesivum (body)</i>       | 634715      | 423320 | 1127 | 724.23                      | 403                        | 39.86       | 83.5                 | 87.2    |
|                 | <i>C.adhaesivum (nematocyst)</i> | 271167      | 160450 | 1574 | 962.67                      | 571                        | 46.2        | 87.8                 | 91.1    |
|                 | <i>S.haddoni</i>                 | 196433      | 150054 | 1038 | 718.72                      | 449                        | 43.48       | 81.2                 | 83.7    |
|                 | <i>Ha.hemprichii (A)</i>         | 131444      | 116964 | 605  | 507.94                      | 339                        | 46.63       | 50.2                 | 50.1    |
|                 | <i>Ha.hemprichii (B)</i>         | 161588      | 132154 | 1352 | 834.03                      | 479                        | 47.14       | 85.8                 | 86.5    |
|                 | <i>Ha.hemprichii (C)</i>         | 140865      | 123392 | 870  | 628.95                      | 401                        | 48.63       | 60.4                 | 59.7    |
|                 | <i>Ha.hemprichii (D)</i>         | 166159      | 139624 | 1232 | 768.72                      | 430                        | 45.9        | 92.2                 | 92.5    |
| Heteractina     | <i>Hs.crispa (combined)</i>      | 655116      | 581957 | 545  | 459.17                      | 263                        | 45.17       | 91.8                 | 92.8    |
|                 | <i>M.doreensis (1)</i>           | 169310      | 125063 | 1280 | 829.65                      | 518                        | 45.69       | 81.7                 | 82.6    |
|                 | <i>M.doreensis (2)</i>           | 128634      | 102820 | 678  | 633.31                      | 388                        | 45.79       | 49.8                 | 50.1    |
|                 | <i>M.doreensis (3)</i>           | 174026      | 123083 | 1609 | 984.01                      | 587                        | 46.27       | 85.5                 | 87.2    |
|                 | <i>M.doreensis (4)</i>           | 152321      | 113560 | 1326 | 856.41                      | 549                        | 47.49       | 70.7                 | 75      |
| Entacmaea       | <i>E.quadricolor (1)</i>         | 159879      | 110724 | 1398 | 815.42                      | 433                        | 38.95       | 95.1                 | 95.8    |
|                 | <i>E.quadricolor (2)</i>         | 182027      | 136593 | 1001 | 687.55                      | 407                        | 40.25       | 89.3                 | 90.1    |
|                 | <i>E.quadricolor (3)</i>         | 218132      | 166239 | 1051 | 722.73                      | 438                        | 41.93       | 90.7                 | 92.4    |
|                 | <i>E.quadricolor (4)</i>         | 211617      | 161980 | 1058 | 728.22                      | 448                        | 42.49       | 93                   | 94      |
|                 | <i>E.quadricolor (5)</i>         | 216944      | 166660 | 1054 | 713.1                       | 415                        | 41.54       | 94.2                 | 94.8    |
|                 | <i>E.quadricolor (6)</i>         | 209482      | 159611 | 1052 | 722.63                      | 436                        | 41.8        | 92.6                 | 93.8    |

Supplementary table S1. The the table shos individual transcriptomes state for each SRA sample. Results were sourced by using Trinity\_stats.pl withinTrinity. BUSCO v5.4.2 was used to retrieve BUSCO scores.
